# Supplementary material
Source: PubMed Central journal article supplement (PMC6008165)
Supplement: NIHMS902013-supplement-1.pdf [file NIHMS902013-supplement-1.pdf]

## Supplementary Information

### **Radiation-enhanced delivery of plasmid DNA to tumors utilizing a novel PEI polyplex**

#### **Authors:**

Oliver K. Appelbe <sup>a</sup>, Bieong-Kil Kim <sup>b</sup>, Nick Rymut <sup>a</sup>, Jianping Wang <sup>d</sup>, Stephen J. Kron <sup>a\*</sup> and Yoon Yeo <sup>c\*</sup>,

#### **Affiliations:**

<sup>a</sup> [1] Ludwig Center for Metastasis Research, The University of Chicago, 5758 South Maryland Avenue, MC 9006, Chicago, IL 60637, United States of America [2] Department of Molecular Genetics and Cellular Biology, The University of Chicago, 929 East 57<sup>th</sup> Street, GCIS W519, Chicago, IL 60637, United States of America

<sup>b</sup> Department of Industrial and Physical Pharmacy, Purdue University, 575 Stadium Mall Dr., West Lafayette, IN 47907, USA

<sup>c</sup> [1] Department of Industrial and Physical Pharmacy, Purdue University, 575 Stadium Mall Dr., West Lafayette, IN 47907, USA [2] Weldon School of Biomedical Engineering, Purdue University, West Lafayette, IN 47907, USA [3] Biomedical Research Institute, Korea Institute of Science and Technology, Seongbuk-gu, Seoul, South Korea

<sup>d</sup> [1] Department of Industrial and Physical Pharmacy, Purdue University, 575 Stadium Mall Dr., West Lafayette, IN 47907, USA [2] Department of Pharmaceutics, State Key Laboratory of Natural Medicines, China Pharmaceutical University, Nanjing, China

\* Co-corresponding authors:

Yoon Yeo, Purdue University, 575 Stadium Mall Drive 308C, West Lafayette, IN 47907-2091, phone – (765) 496-9608, fax – (765) 494-6545, yyeo@purdue.edu

Stephen J. Kron, The University of Chicago, GCIS W522A, 929 East 57<sup>th</sup> Street, Chicago, IL 60637, phone - (773) 834-0250, fax - (773) 702-3611, skron@uchicago.edu

**Running title:** Radiation-enhanced PEI-DNA polyplex delivery



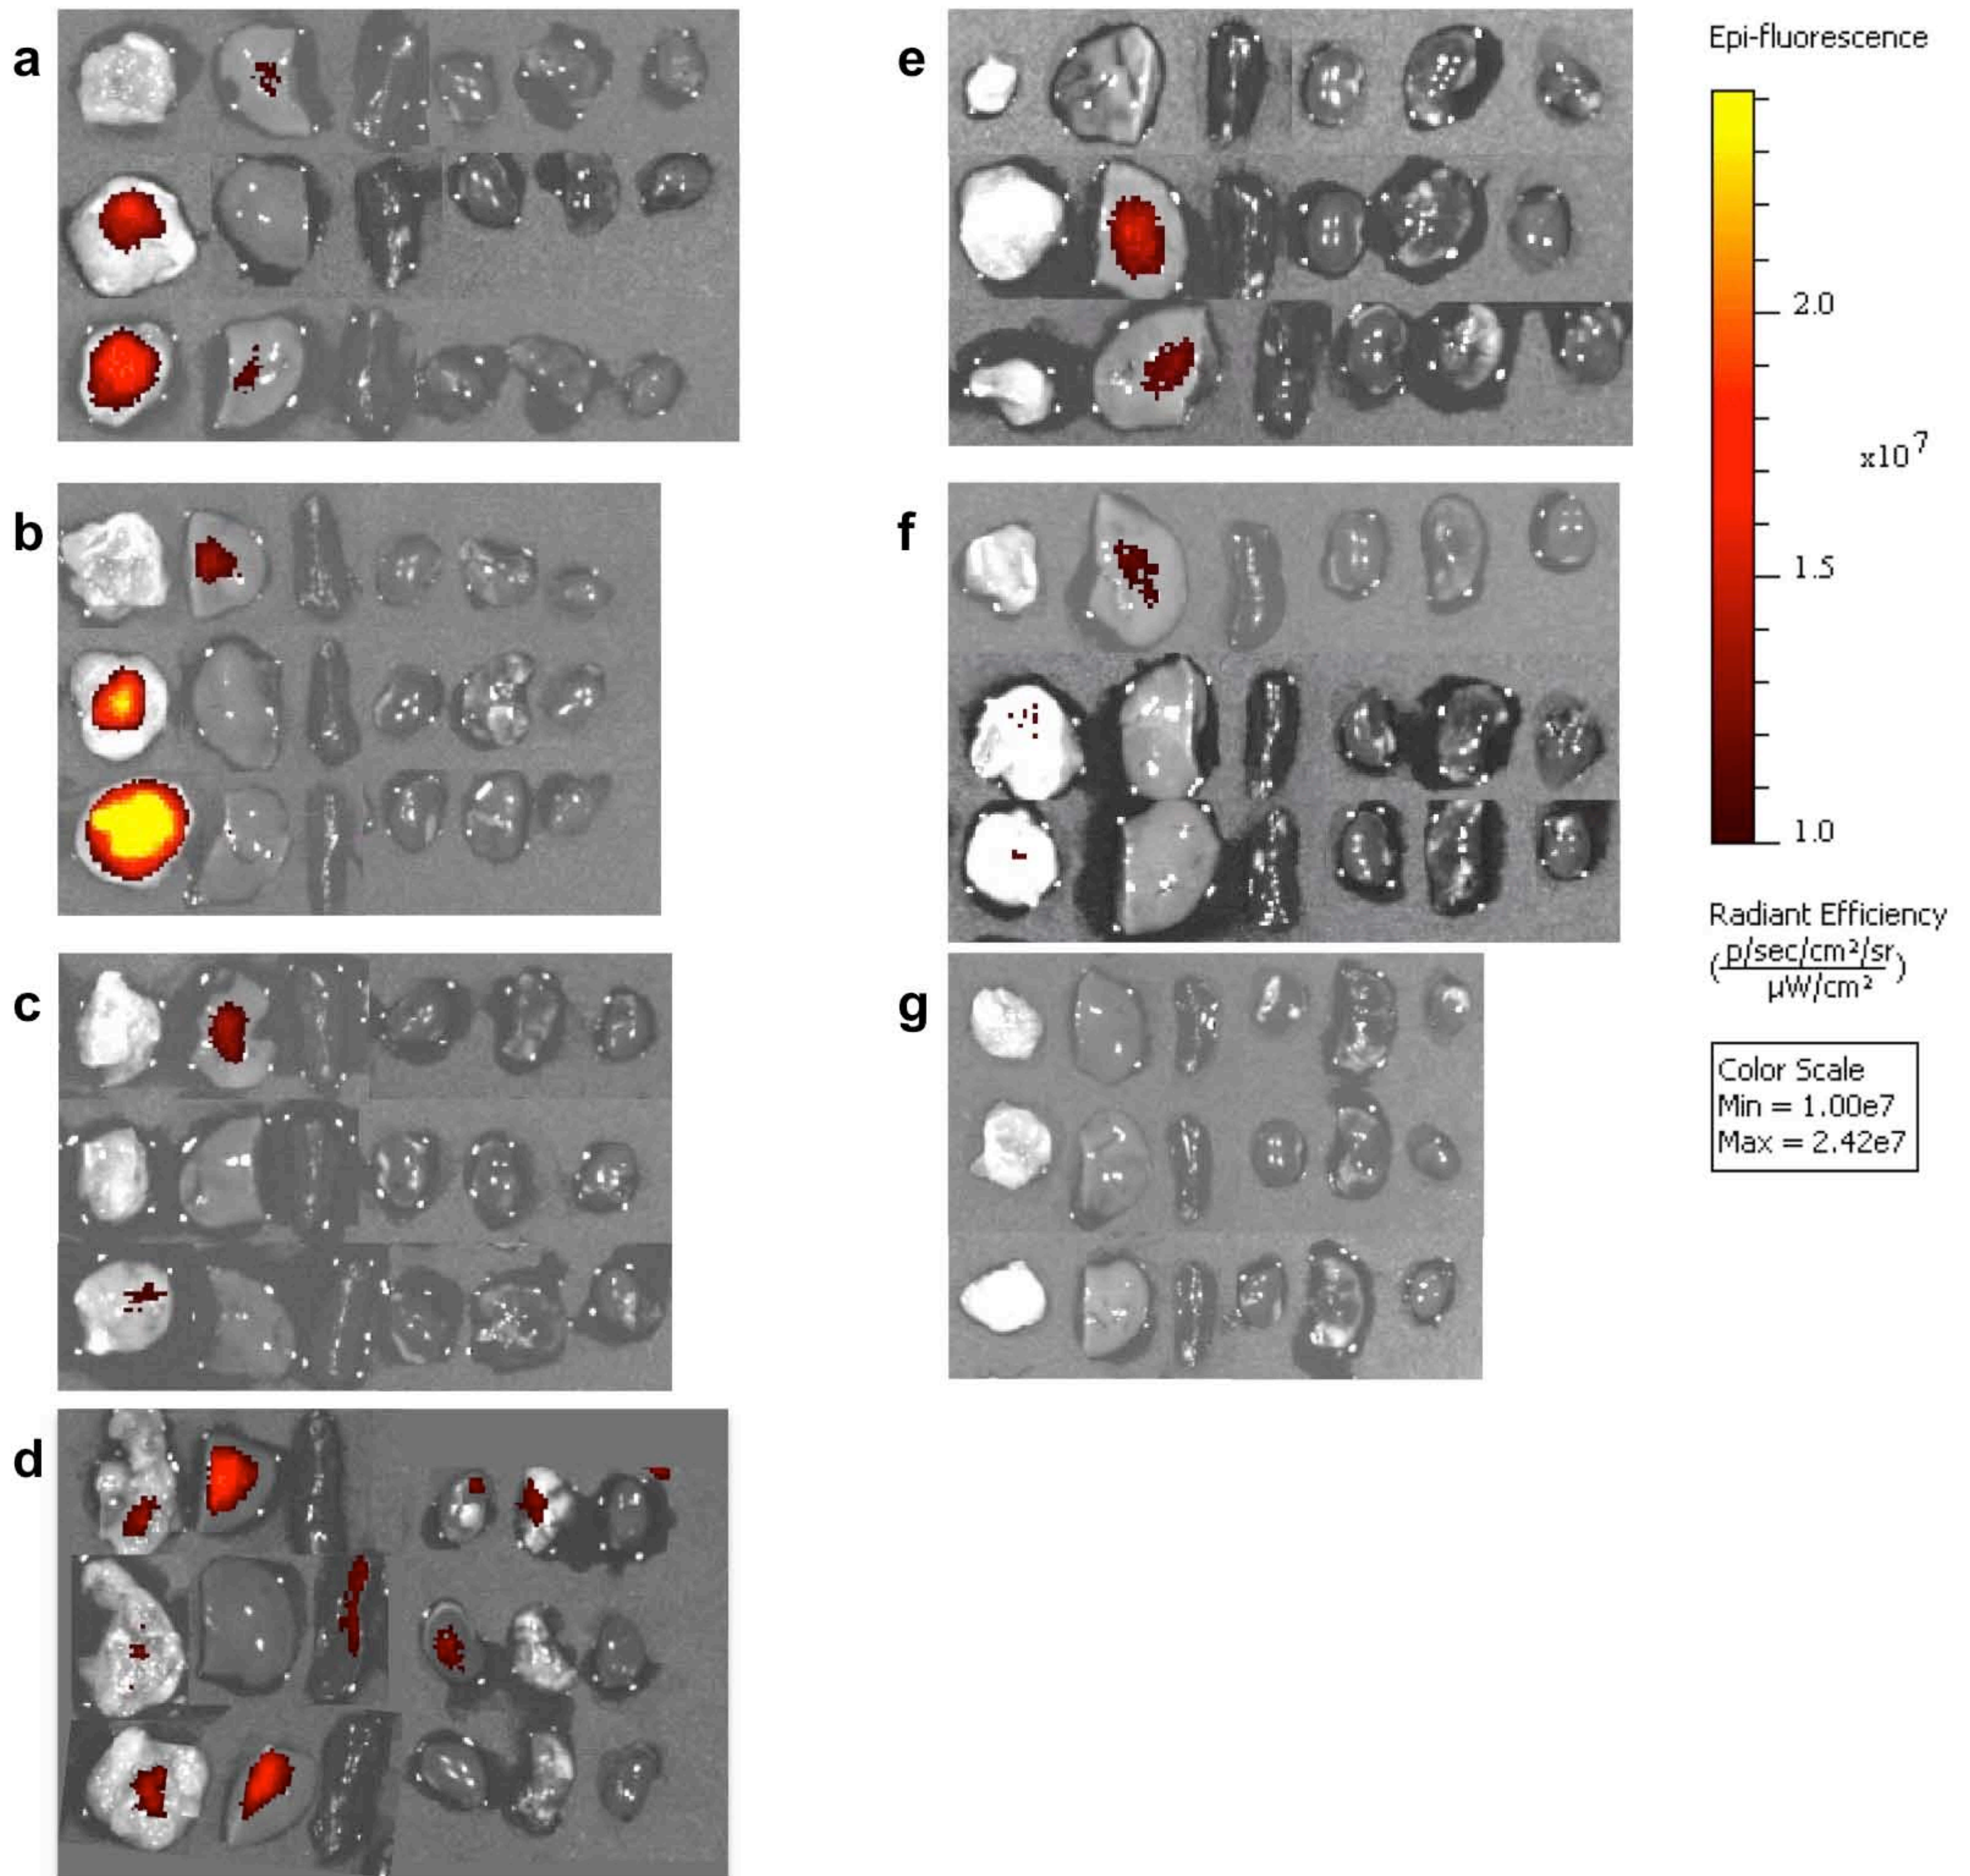

**Supplementary Figure 1.** Off-target tissue accumulation of pDNA. IVIS imaging of iRFP fluorescence in tumor, liver, spleen, kidney, lung, and heart (from left to right) 4 hrs following intravenous administration of pDNA using 3E/DS (a), CLPEI/DS (b), 3E/HA (c), CLPEI/HA (d), jetPEI (e), EnTranster (f), or Coatsome (g) as a vector. Representative images shown.



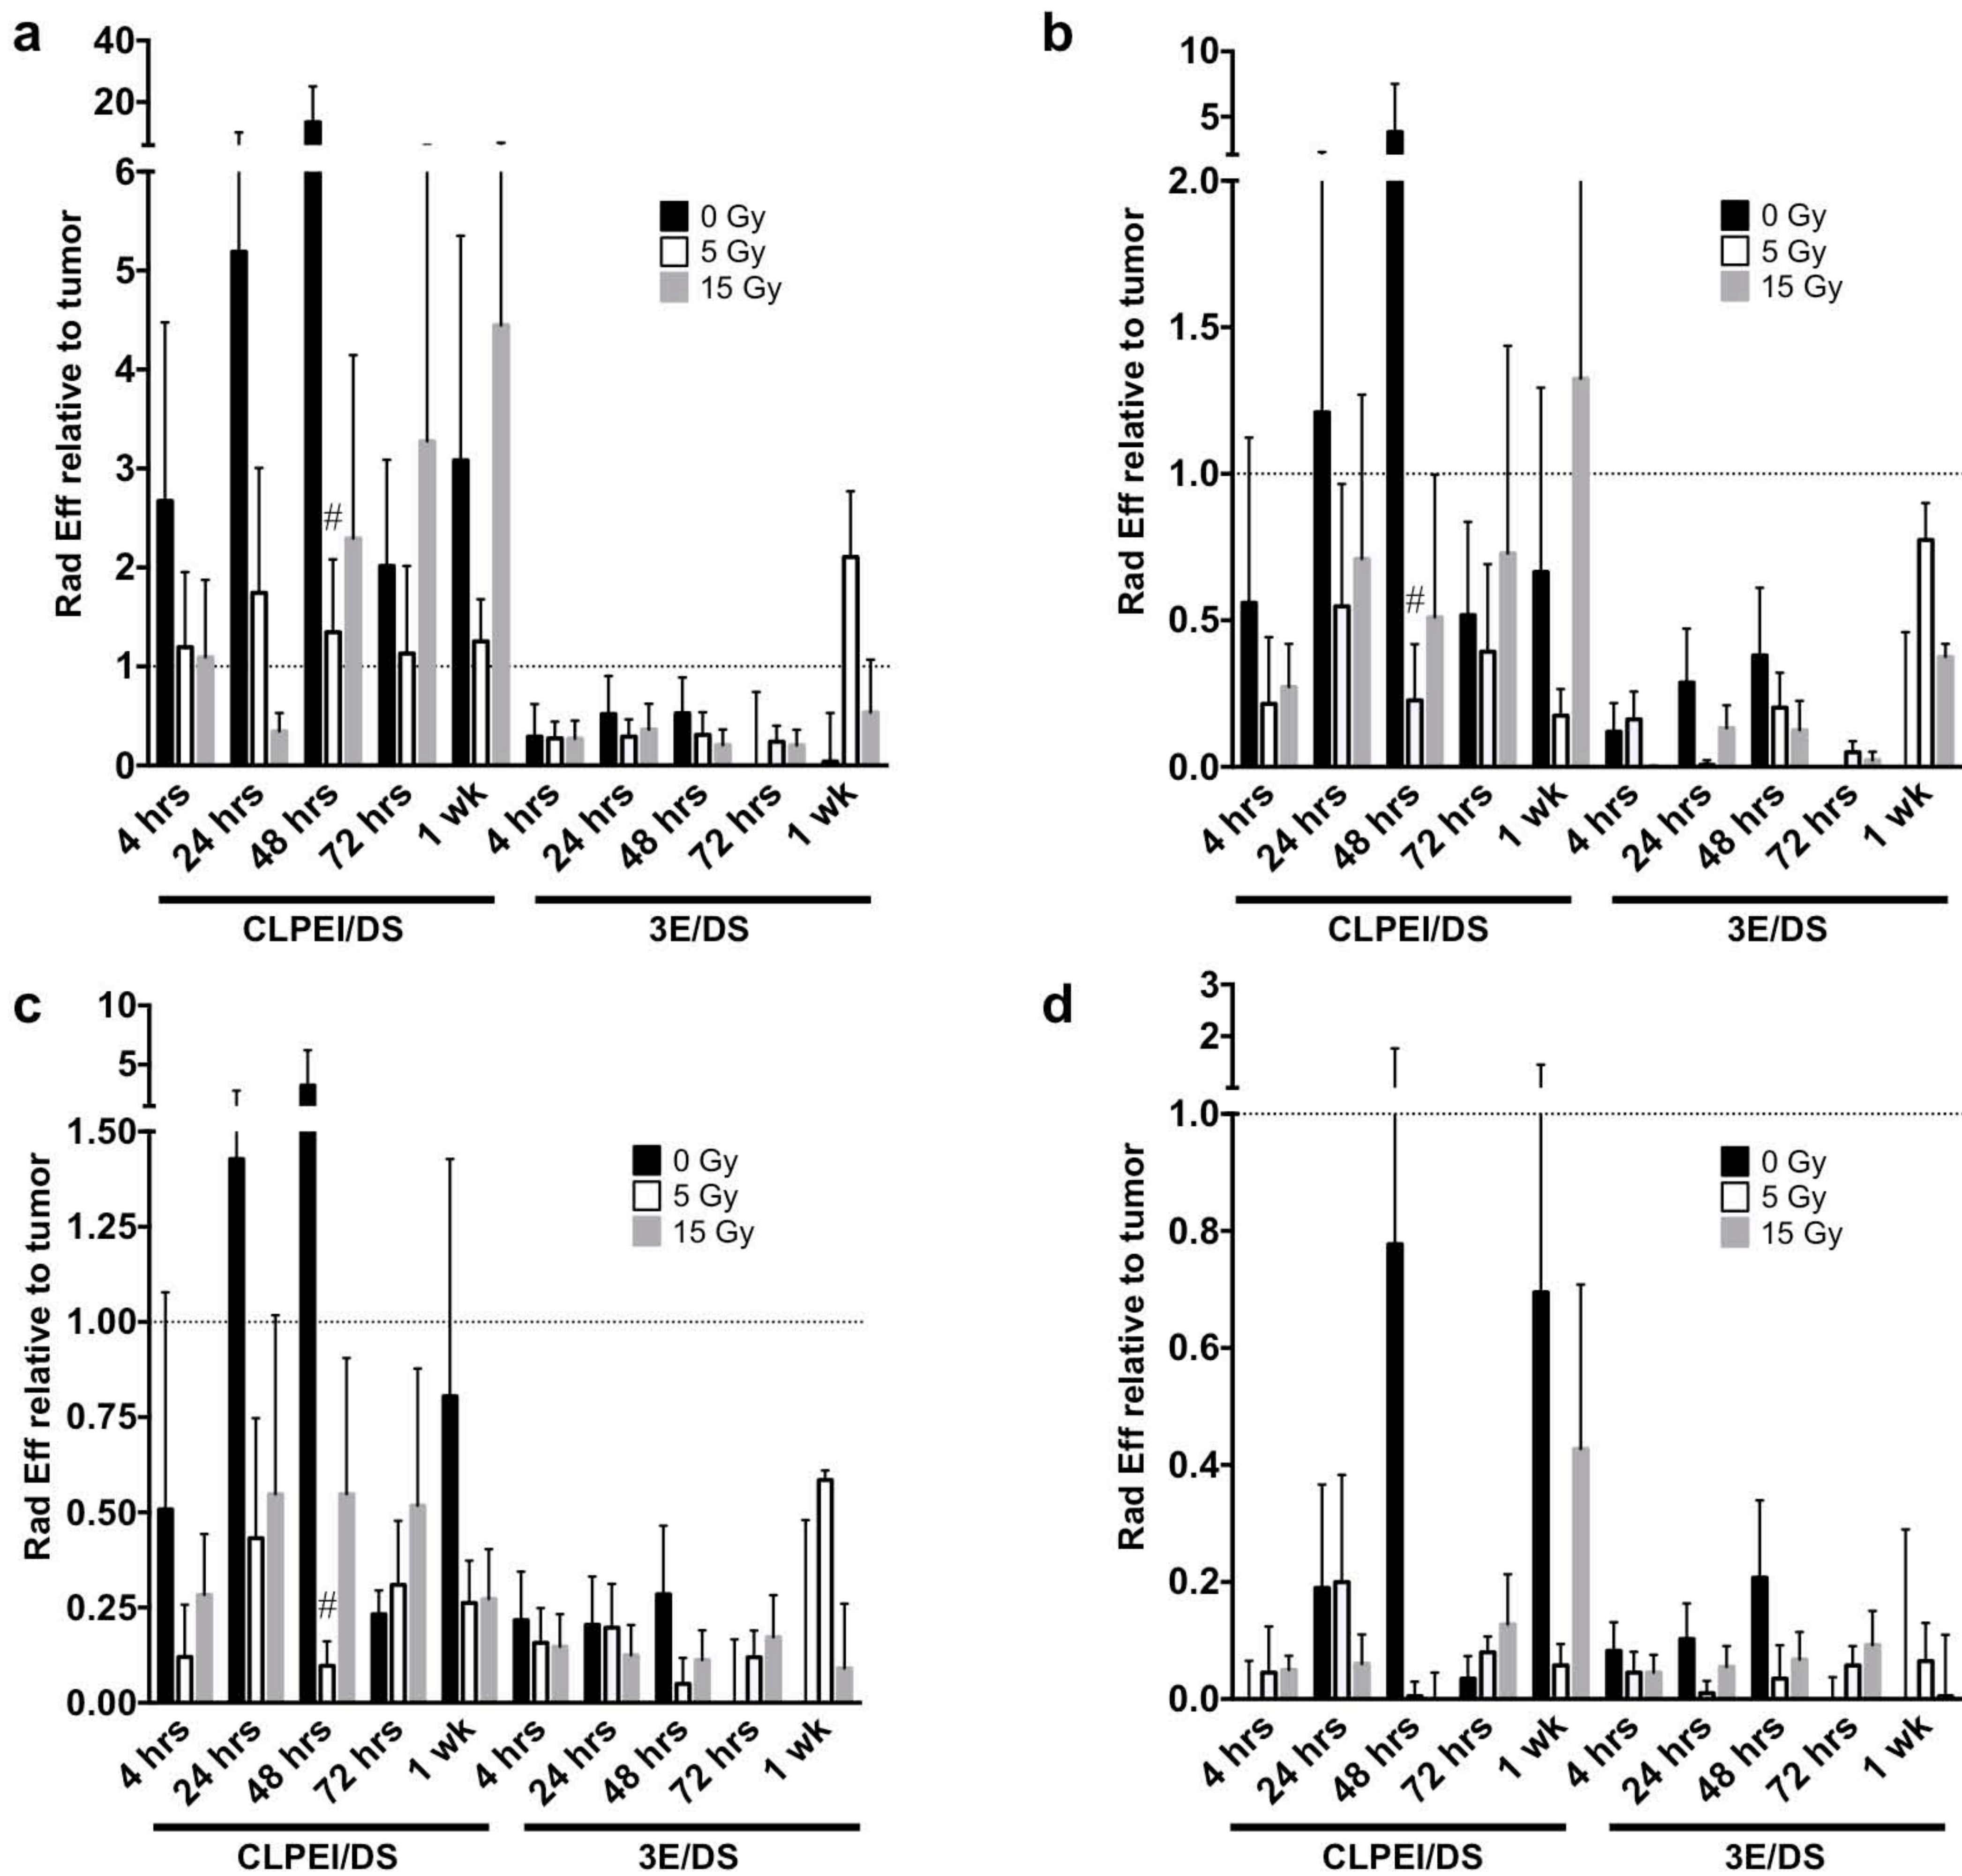

**Supplementary figure 2.** Time course of off-target tissue accumulation of pDNA. IVIS quantification of tissue iRFP fluorescence relative to tumor iRFP fluorescence over time measured in liver (a), spleen (b), kidney (c), and lung (d). Horizontal dotted line indicates relative fluorescence of iRFP in tumor.  $n \geq 4$  for each time point; error bars = SEM; # indicates  $p \leq 0.05$  relative to 0 Gy of same pDNA carrier and time point
